# Supplementary material for: Somatic deficiency of the human E3 ubiquitin ligase CBL in leukocytes impairs B cell but not T cell development and function
Source: Springer Nature journal article supplement (doi:10.1038/s41590-025-02381-7), 2026-01-15

Figure 4J:

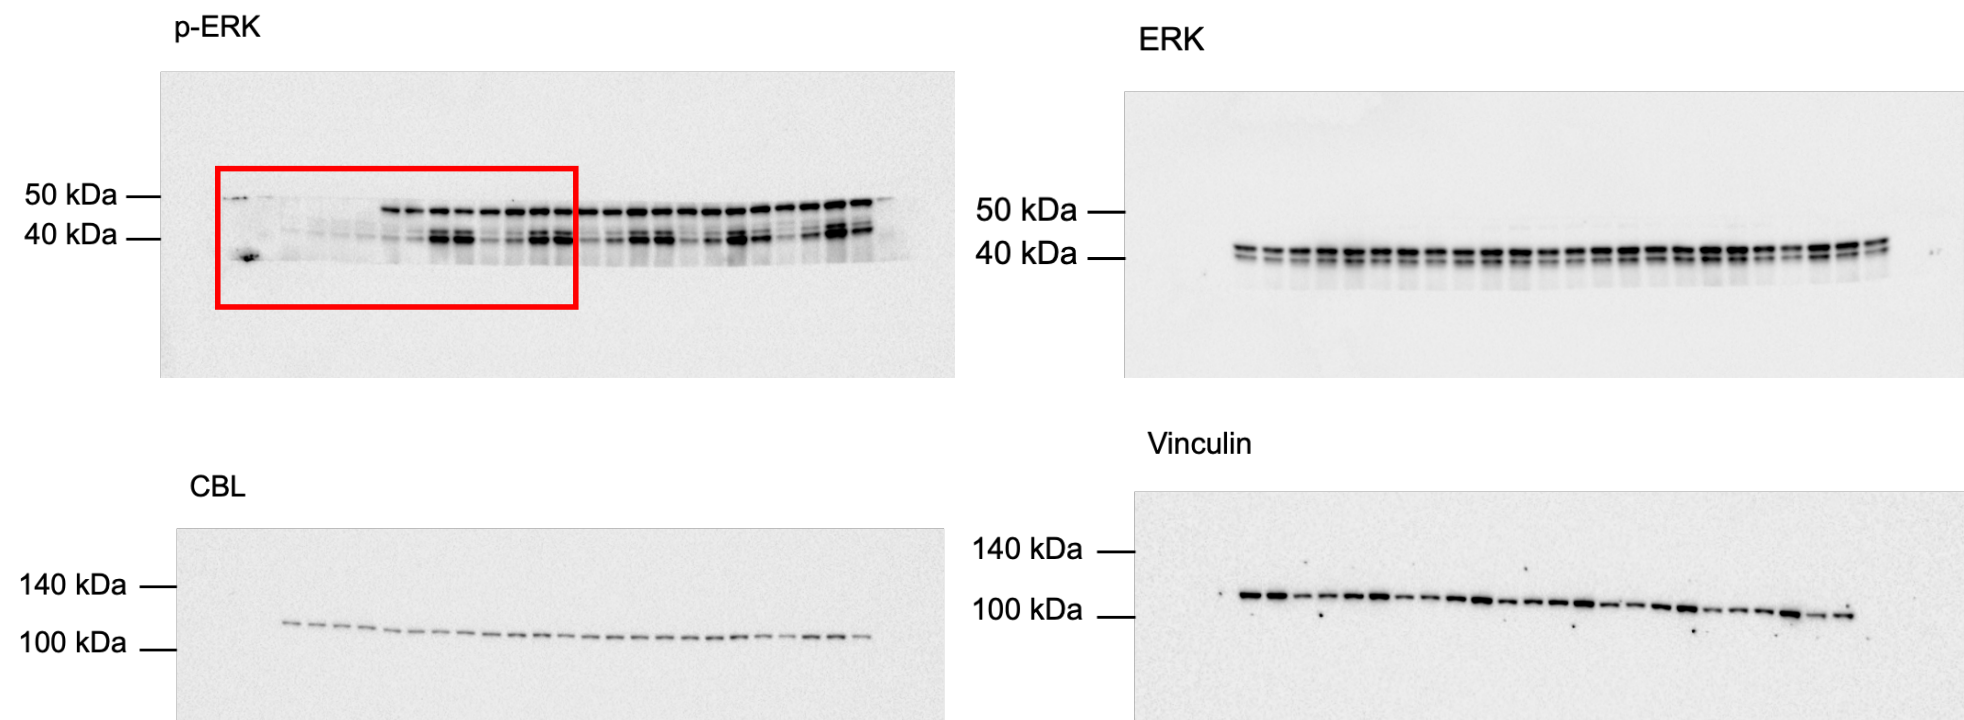

Figure 5D:

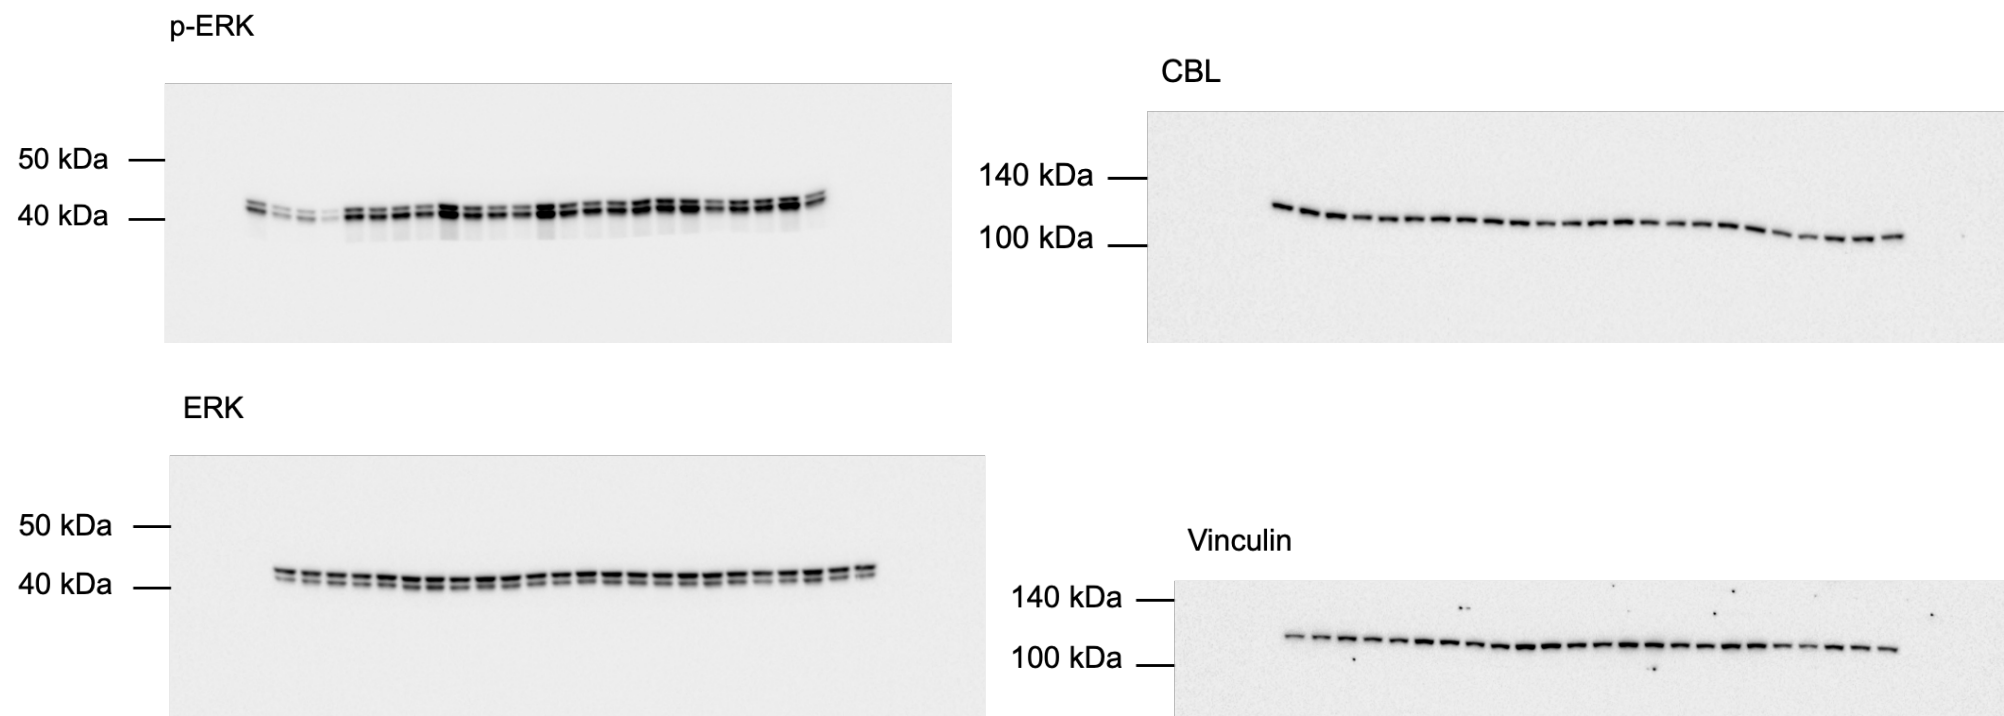

ED Figure 4D:

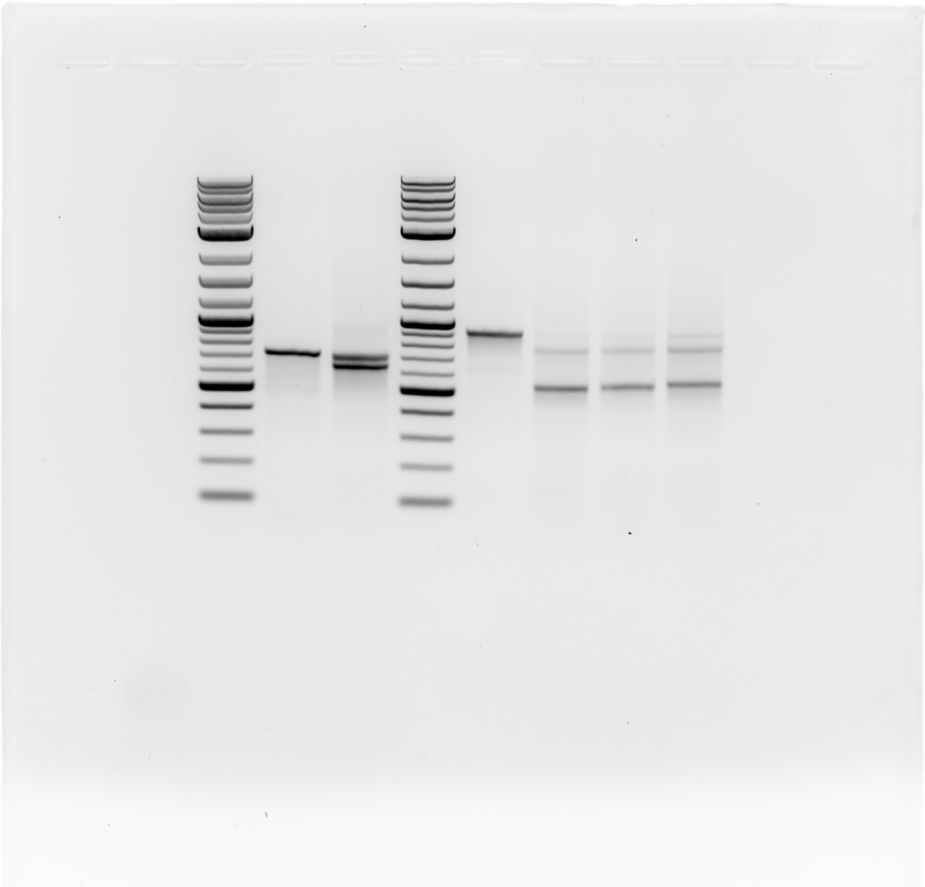

ED Figure 4F:

GAPDH

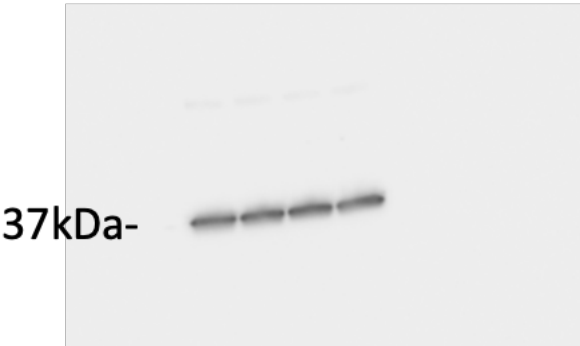

CBL

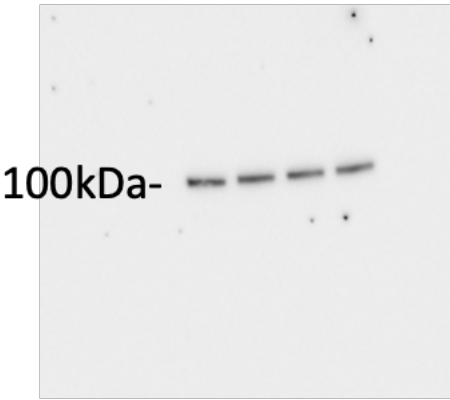

ED Figure 6A:

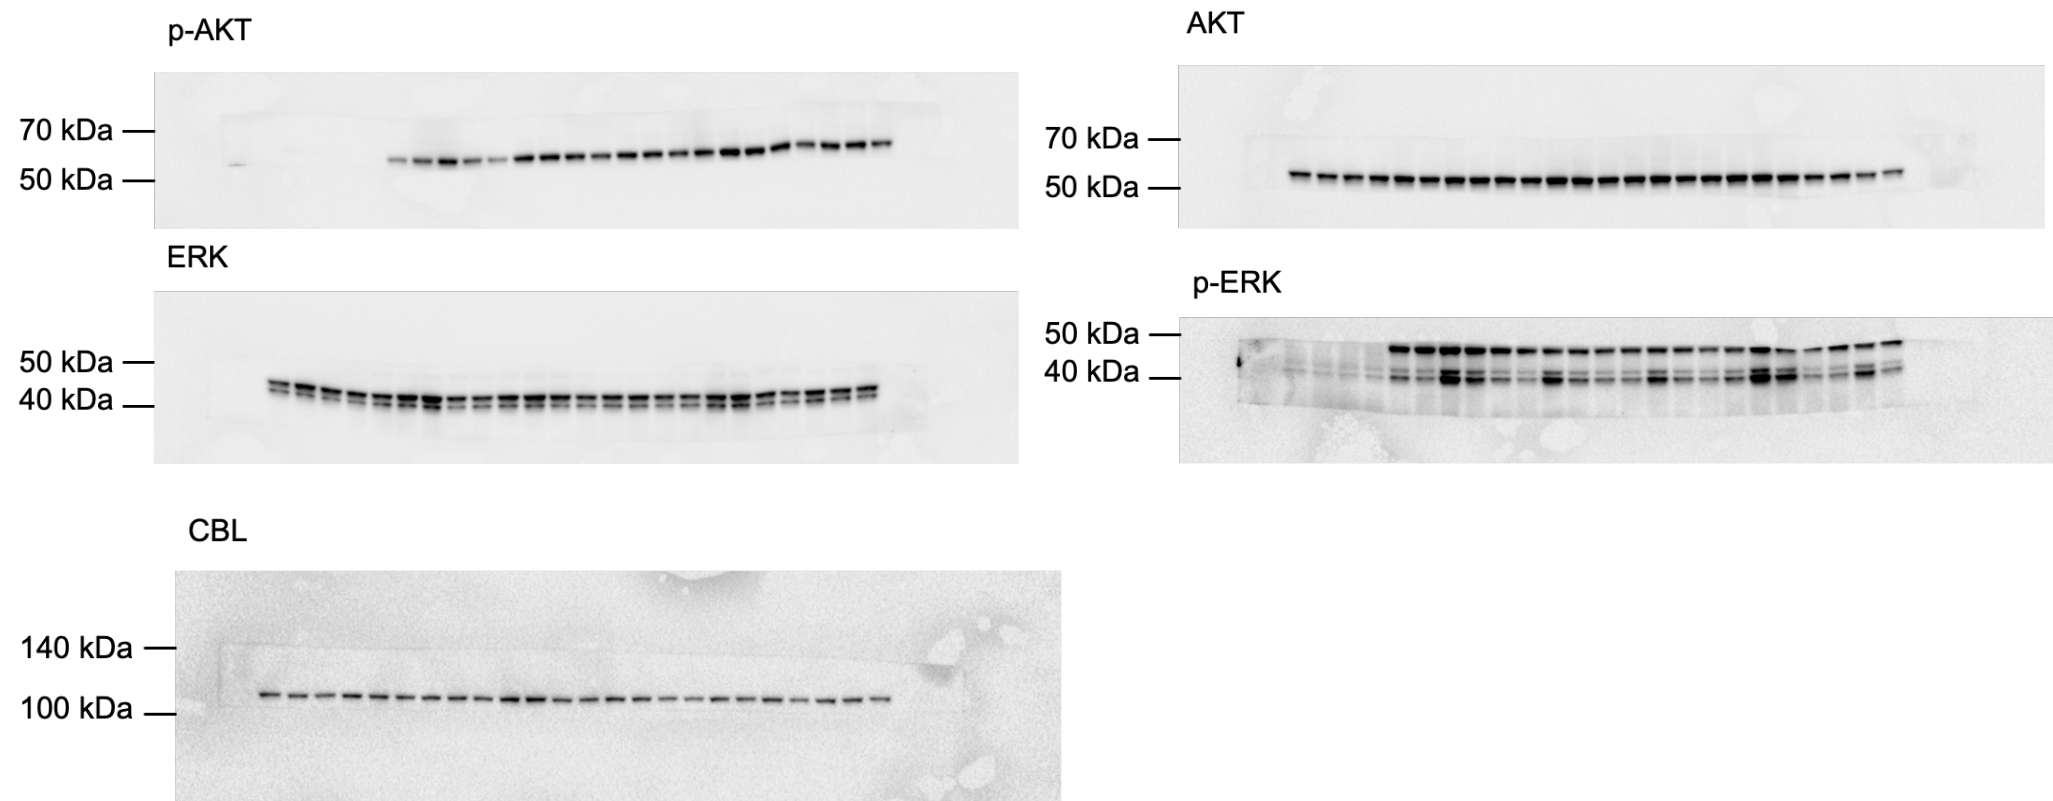

ED Figure 6D:

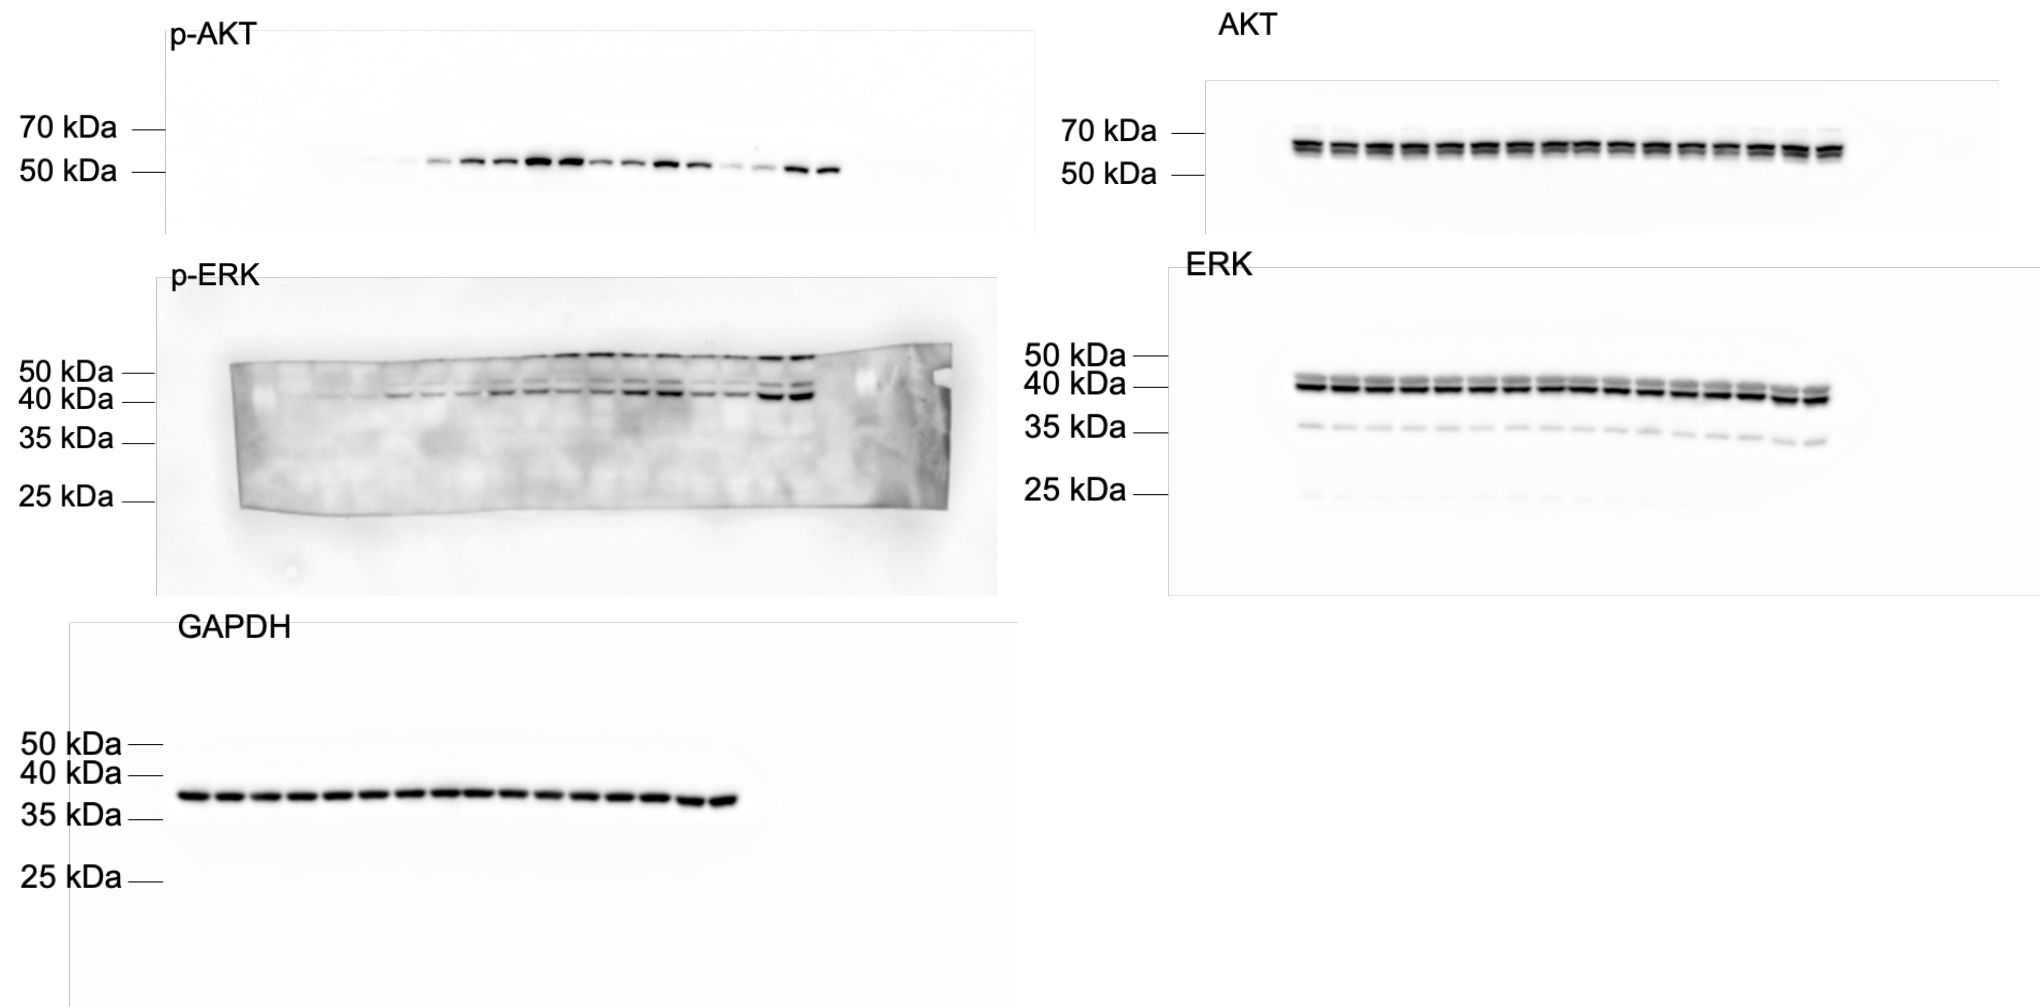

ED Figure 7C:

CBL

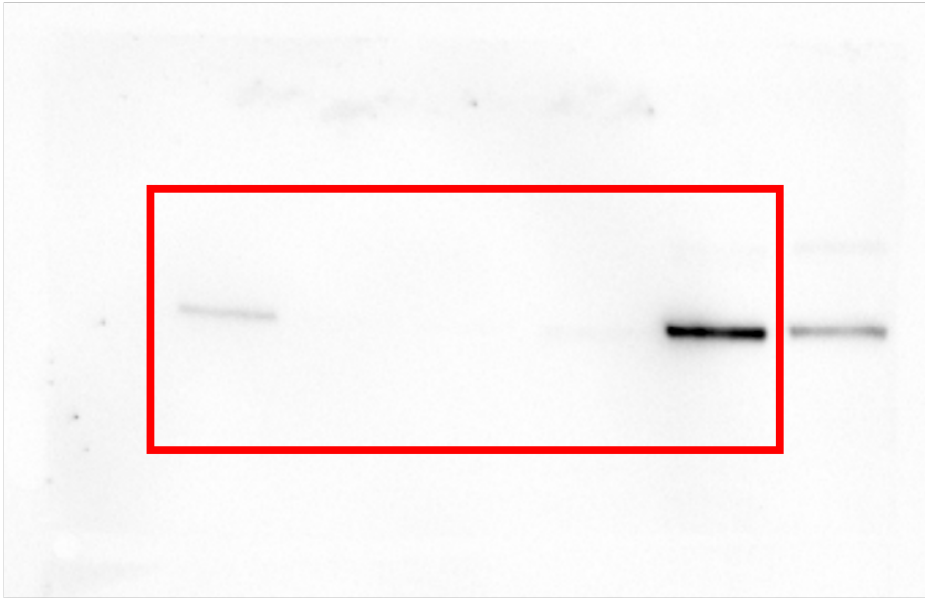

ERK

40kDa-

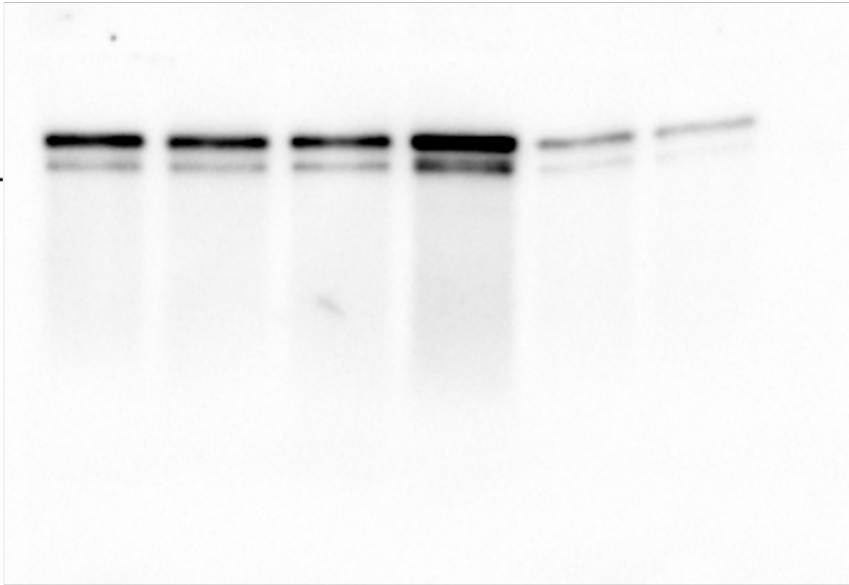

Supplement: MOESM6 [file 41590_2025_2381_MOESM6_ESM.pdf › 41590_2025_2381_MOESM6_ESM.pdf]
